# Supplementary material for: Systems analysis of latent HIV reversal reveals altered stress kinase signaling and increased cell death in infected T cells
Source: PubMed Central journal article supplement (PMC5701066; doi:10.1038/s41598-017-15532-0), 2017-11-23
Supplement: 41598_2017_15532_MOESM1_ESM.pdf [file 41598_2017_15532_MOESM1_ESM.pdf]

# **Systems analysis of latent HIV reversal reveals altered stress kinase signaling and increased cell death in infected T cells**

Linda E. Fong, Endah S. Sulistijo, and Kathryn Miller-Jensen\*

**Supplementary Information**

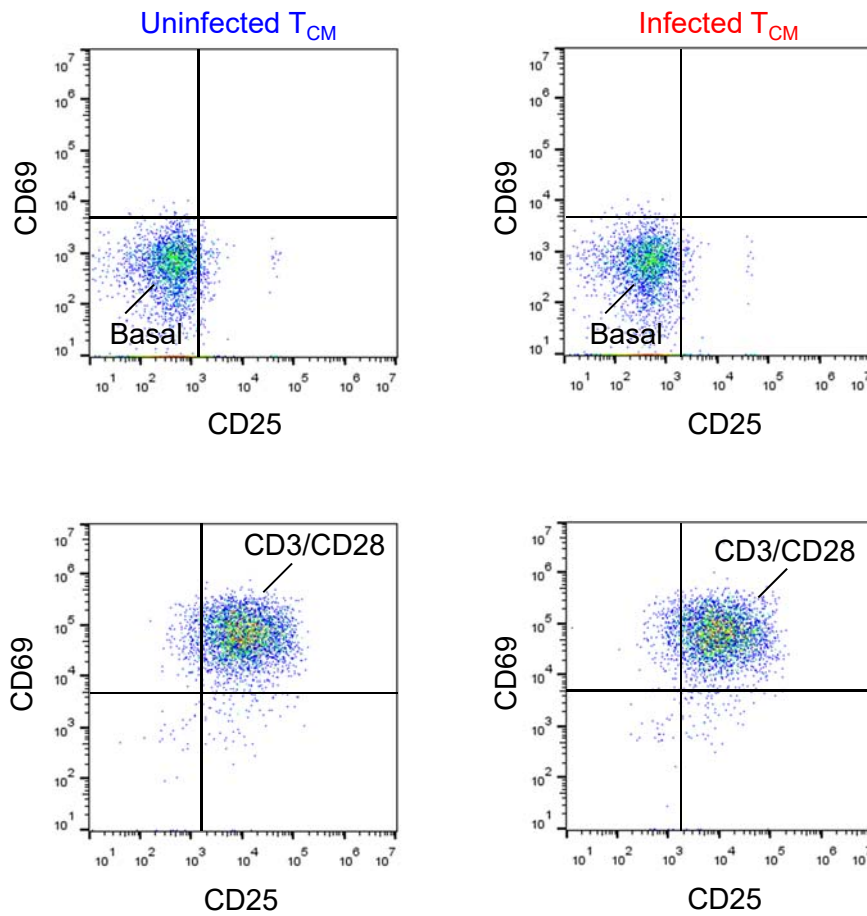

**Supplementary Figure S1. CD3/CD28 stimulation induces T cell activation similarly in uninfected and latently infected cells.** Uninfected and infected primary cultured CD4<sup>+</sup> T<sub>CM</sub> populations were co-stained for the activation markers, CD25 and CD69, in the basal state and following 48 hours of CD3/CD28 stimulation and measured by flow cytometry.

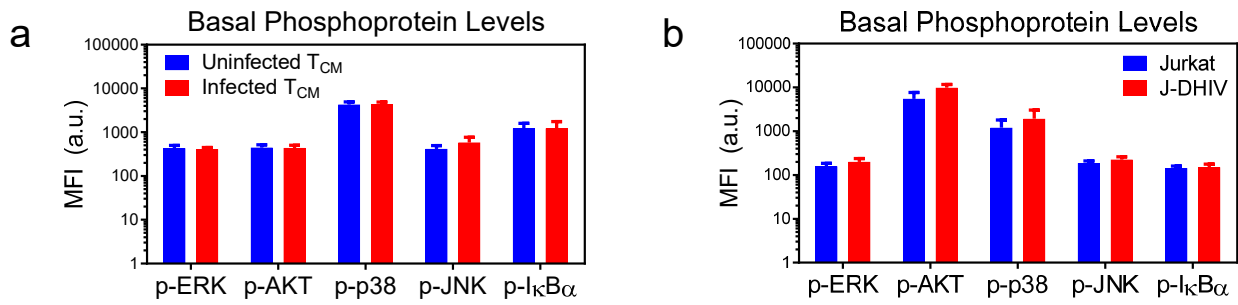

**Supplementary Figure S2. Latently infected cells and uninfected cells show similar levels of basal phosphorylation.** (a-b) Basal phosphorylation levels of ERK, AKT, p38, JNK, and I $\kappa$ B $\alpha$  as measured by bead-based immunoassay for uninfected (blue) and infected (red) primary T<sub>CM</sub> cells from one representative donor (a) and for Jurkat (blue) and J-DHIV (red) T cells (b). Data are plotted as means  $\pm$  standard deviations (SD) of at least 3 biological replicates.

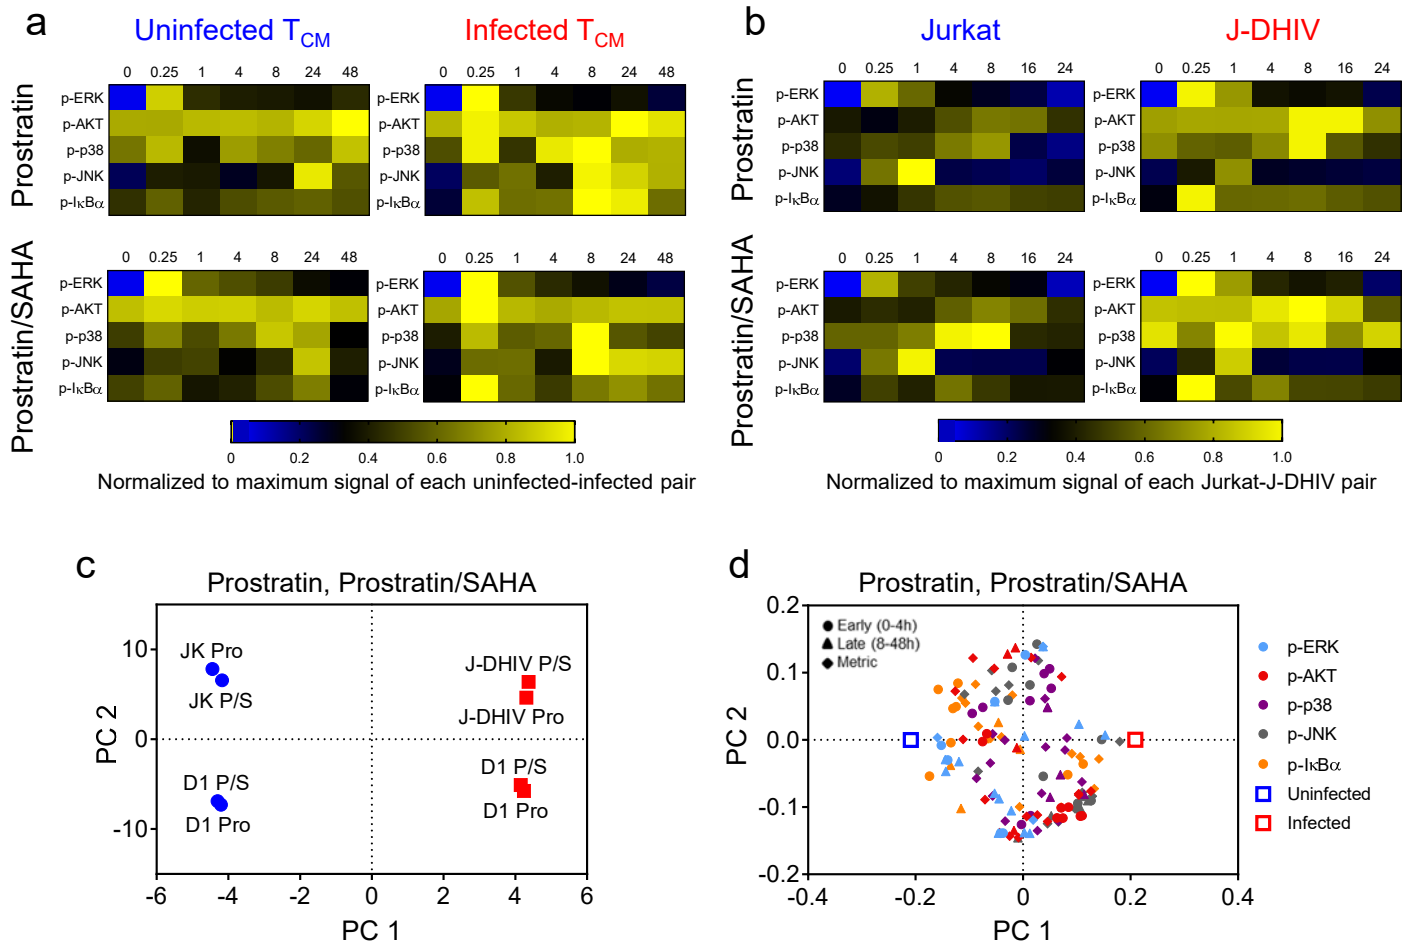

**Supplementary Figure S3. Phospho-signaling differences following stimulation with prostratin +/- SAHA classify uninfected versus latent HIV-infected T cells in a PLS-DA model.** (a-b) Heatmaps of phospho-protein time courses measured by bead-based immunoassay following Prostratin or Prostratin/SAHA stimulation in uninfected (blue) and infected cells (red) for (a) primary T<sub>CM</sub> cells from one donor and (b) Jurkat and J-DHIV cell lines. Phospho-signals are normalized to the maximum level of each uninfected and infected pair. Phospho-signals were measured in biological triplicate and 90% of measurements had an SD < 15%. Raw data provided in **Supplementary Datasets S9-S12**. (c-d) PLS-DA model comprising three principal components was calculated from phospho-protein time course data presented in (a-b) for uninfected and infected T cells treated with Prostratin and Pro/SAHA (R<sub>2</sub>X = 0.71, R<sub>2</sub>Y = 0.99, Q<sub>2</sub> = 0.82). (c) Model scores of uninfected (blue) and infected (red) cells for both primary T<sub>CM</sub> cells and Jurkat/J-DHIV cell lines projected onto PC1 versus PC2. (d) Model loadings of phospho-proteins and host-cell classification (uninfected, blue; infected, red) projected onto PC1 versus PC2 for each phospho-protein (see legend for color codes). Early time points (0-4 hours), circles; late time points (8-48 hours), triangles; time-dependent metrics, squares.

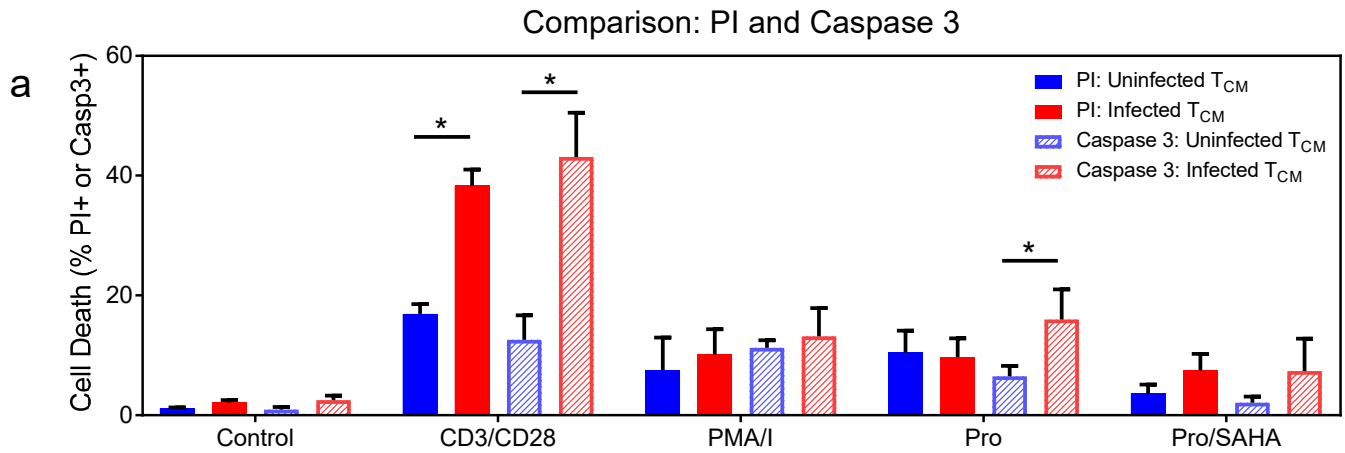

**Supplementary Figure S4. PI measurements correlate closely to apoptosis levels as measured by cleaved caspase 3 immunostaining.** (a) Uninfected and infected primary T<sub>CM</sub> cells were treated with the indicated stimuli and cell death was assayed via PI staining (same as data presented in **Figure 4a**) or cleaved caspase 3 immunostaining and measured by flow cytometry. Percentage of positively stained cells at 24 hours was measured in biological duplicate. Bar graph depicts means  $\pm$  SD.

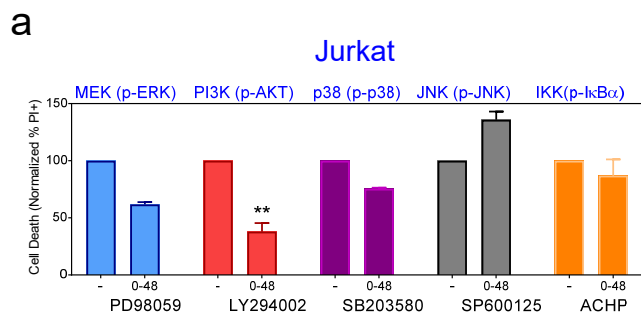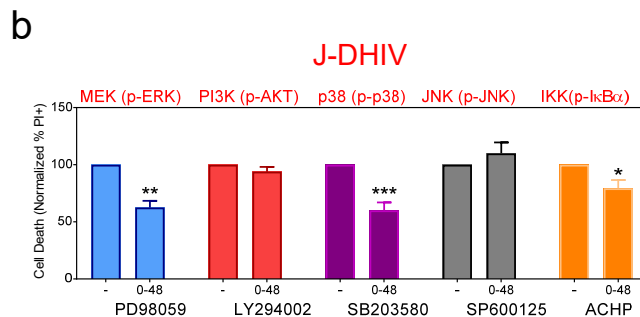

**Supplementary Figure S5. Pathway inhibition in Jurkat/DHIV cell lines emphasizes the role of p38 for cell death regulation.** Cell death in the presence of the indicated inhibitor was measured in response to stimulation with CD3/CD28 in Jurkat (a) and J-DHIV cells (b) by flow cytometry and normalized to the uninhibited control. Percentage of PI<sup>+</sup> cells was measured in biological triplicate. Data are presented as means  $\pm$  SD. Student t-tests were conducted to determine significance (\*\*\*,  $p \leq 0.001$ ; \*\*,  $p \leq 0.01$ , \*  $p \leq 0.05$ , ns,  $p > 0.05$ ).

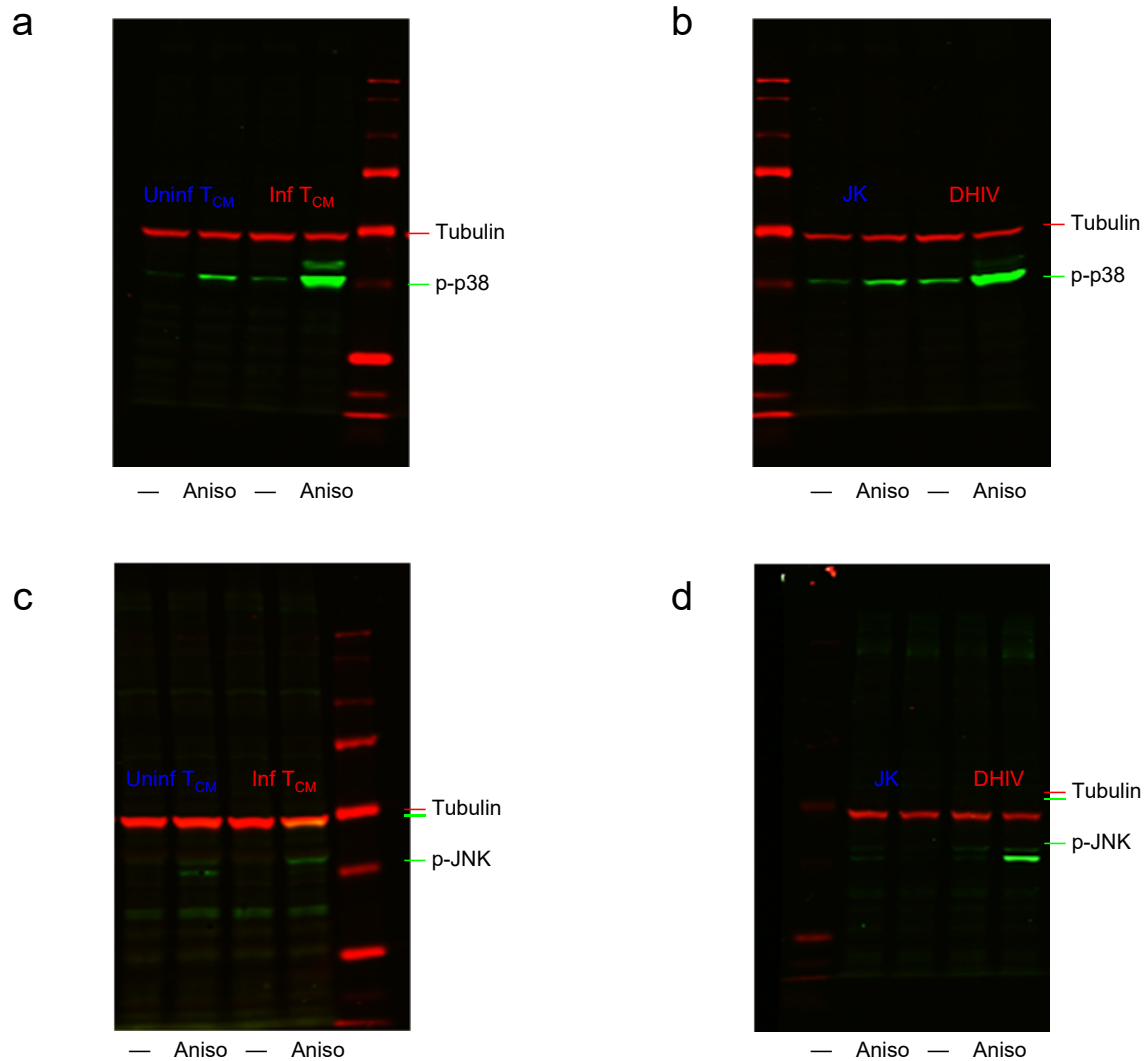

**Supplementary Figure S6. Western blots show that latently infected cells exhibit increased signaling following treatment with the p38 and JNK agonist anisomycin.** (a-d) Western blots for p-p38 (a-b) and p-JNK (c-d) expression with and without anisomycin treatment in uninfected (blue, left 2 lanes) and infected (red, right 2 lanes) primary  $T_{CM}$  cells (a,c) and Jurkat (JK) /J-DHIV cells (b,d). Antibodies from Cell Signaling Technologies: Anti- p-p38 (Cat # 9211S)<sup>46</sup> and Anti- p-JNK (Cat # 9251S)<sup>46</sup> Antibody from Abcam: Anti- alpha Tubulin Loading Control (Cat # ab89984)<sup>47</sup>

| Phospho-protein | Residue Measured                                                                 | Relevance to HIV                                                                                                                                                                                                                                                                                                                                                                                                                                                                                                                                                    |
|-----------------|----------------------------------------------------------------------------------|---------------------------------------------------------------------------------------------------------------------------------------------------------------------------------------------------------------------------------------------------------------------------------------------------------------------------------------------------------------------------------------------------------------------------------------------------------------------------------------------------------------------------------------------------------------------|
| p-ERK           | Thr <sup>202</sup> /Tyr <sup>204</sup><br>Thr <sup>185</sup> /Tyr <sup>187</sup> | <ul style="list-style-type: none"> <li>ERK phosphorylation of the transcription factor LSF reduces binding at the HIV LTR, thereby decreasing recruitment of YY1 and histone deacetylases, to promote HIV reactivation (Ylisastigui, L. J Virol. 2005).</li> <li>ERK phosphorylates transcription factors c-Myc, AP-1, NF-κB, IL-6, ATF-2, and ELK-1 which contribute to HIV expression (Yang, X. J Bio Chem. 1999).</li> <li>ERK inhibitor U0126 blocks both P-TEFb recruitment to the HIV LTR, reducing HIV transcription (Briant, L. J Immuno. 1998).</li> </ul> |
| p-AKT           | Ser <sup>473</sup>                                                               | <ul style="list-style-type: none"> <li>SAHA induced acetylation and NF-κB activation is AKT-dependent. Treatment of primary cells with PI3K inhibitor Wortmannin has shown no effect on HIV reactivation (Contreras, X. PLoS Pathogens. 2009).</li> <li>Nef-mediated HIV reactivation is associated with AKT activation. Treatment with protease inhibitors, but not RTIs, can block this AKT activation. (Kumar, A et al. Sci Rep. 2016)</li> </ul>                                                                                                                |
| p-p38           | Thr <sup>180</sup> /Thr <sup>182</sup>                                           | <ul style="list-style-type: none"> <li>p38 phosphorylation increases LSF occupancy at LTR, promoting HIV transcription and p38 inhibition blocks the ability of YY1 to inhibit HIV activation (Ylisastigui 2005).</li> </ul>                                                                                                                                                                                                                                                                                                                                        |
| p-JNK           | Thr <sup>183</sup> /Tyr <sup>185</sup>                                           | <ul style="list-style-type: none"> <li>Treatment of primary cells with JNK Inhibitor V, AS601245, prevents HIV reactivation (Wolschendorf, F. J Virol. 2012).</li> </ul>                                                                                                                                                                                                                                                                                                                                                                                            |
| p-IκBα          | Ser <sup>32</sup> /Ser <sup>36</sup>                                             | <ul style="list-style-type: none"> <li>IKK-dependent phosphorylation and degradation of IκBα leads to subsequent release and nuclear translocation of the NF-κB transcription factor, which positively regulates HIV transcription (Brooks, D. PNAS. 2003).</li> <li>In CCL19-resting CD4+ T cells, inhibition of AP-1 and NF-κB inhibits HIV integration. (Saleh, S et al. Retrovirology. 2016)</li> </ul>                                                                                                                                                         |

**Supplementary Table S1. Phosphorylation sites and phospho-protein involvement in HIV activation and expression.**



| Estimated Latent Percentage | Donor 1                                 | Donor 2                                | Donor 3                  |
|-----------------------------|-----------------------------------------|----------------------------------------|--------------------------|
| Fig. 1e                     | 17.3 ± 5.8                              | 42.9 ± 1.3                             | 48.1 ± 1.8               |
| Fig. 1f                     | 36.1 ± 3.7                              | 36.9 ± 2.9                             | 45.2 ± 2.1               |
| Fig. 3a, c                  | 17.3 ± 5.8                              | 42.9 ± 1.3                             | 48.1 ± 1.8               |
| Fig. 3b, d                  | 36.1 ± 3.7                              | 36.9 ± 2.9                             | 45.2 ± 2.1               |
| Fig. 4a-b                   | 17.3 ± 5.8                              | 42.9 ± 1.3                             | 48.1 ± 1.8               |
| Fig. 4c-d                   | 36.1 ± 3.7                              | 36.9 ± 2.9                             | 45.2 ± 2.1               |
| Fig. 4e-f                   | 22.6 ± 1.3<br>34.4 ± 4.5<br>43.7 ± 3.2  | 32.7 ± 3.3<br>55.6 ± 3.7<br>47.0 ± 4.8 |                          |
| Fig. 5a                     |                                         | 39.2 ± 1.7                             |                          |
| Fig. 5a-d                   | 17.3 ± 5.8                              | 42.9 ± 1.3                             | 48.1 ± 1.8               |
| Fig. 5e-f                   | 22.6 ± 1.3<br>34.4 ± 4.5<br>43.7 ± 3.2  | 32.7 ± 3.3<br>55.6 ± 3.7<br>47.0 ± 4.8 |                          |
| Fig. 6c, g, k               |                                         | 54.2 ± 6.9                             |                          |
| Fig. 6f, j                  |                                         | 36.2 ± 2.6                             |                          |
| S2 Fig. a                   | 17.3 ± 5.8<br>36.1 ± 3.7                | 42.9 ± 1.3<br>36.9 ± 2.9               | 48.1 ± 1.8<br>45.2 ± 2.1 |
| S3 Fig. a-d                 | 25.97 ± 0.7                             |                                        |                          |
| S4 Fig. a                   | 25.97 ± 0.7                             |                                        |                          |
| S4 Fig. b                   | 17.3 ± 5.8<br>36.1 ± 3.7<br>25.97 ± 0.7 |                                        |                          |
| S6 Fig. a-f                 |                                         | 54.2 ± 6.9                             |                          |
| S7 Fig. a-b                 |                                         | 36.2 ± 2.6                             |                          |
| S8 Fig. a-b                 | 36.1 ± 3.7                              | 36.9 ± 2.9                             | 45.2 ± 2.1               |
| S8 Fig. c-d                 | 25.97 ± 0.7                             |                                        |                          |

**Supplementary Table S2. Estimated percentage of latent cells per donor per experiment based on the response to CD3/CD28 stimulation.**
